# Supplementary material for: Lacticaseibacillus casei HY2782 improves the intestinal barrier and tract environment and ultimately prolongs the lifespan of Caenorhabditis elegans
Source: Royal Society of Chemistry journal article supplement (doi:10.1039/d5fo01239b), 2025-01-01
Supplement: d5fo01239b1.pdf [file d5fo01239b1.pdf]

## Appendix (Supplementary information)

### ***Lactaseibacillus casei* HY2782 improves the intestinal barrier and tract environment and ultimately prolongs the lifespan of *Caenorhabditis elegans***

**Table S1.** Composition of artificial colon fermentation media

| Component                | Concentration (g/L) |                         |
|--------------------------|---------------------|-------------------------|
|                          | Normal colon        | High-protein diet colon |
| Peptone                  | 1                   | 1                       |
| Yeast extract            | 3                   | 3                       |
| Mucin                    | 4                   | 4                       |
| Casein                   | -                   | 8                       |
| D-Glucose                | 0.4                 | 0.4                     |
| L-Cysteine-hydrochloride | 0.5                 | 0.5                     |
| Pectin                   | 2                   | 2                       |
| Xylan                    | 1                   | 1                       |
| Arabinogalactan          | 1                   | 1                       |
| Inulin                   | 0.5                 | 0.5                     |
| Starch                   | 3                   | 3                       |
| Bile salt                | 0.4                 | 0.4                     |
| Resazurin solution       | 0.0025              | 0.0025                  |
